# Supplementary material
Source: HighWire-hosted journal article supplement (https://rc.rcjournal.com/highwire/filestream/23978/field_highwire_adjunct_files/0/rc-09925-File001.docx)
Supplement: rc-09925-File001.docx [file rc-09925-File001.docx]

**Table SM1.** Hospital´s characteristics

|  | Location | Health care system | Number of ICU beds | ICU admissions n (2019) | COVID-19 subjects included |
| --- | --- | --- | --- | --- | --- |
| Hospital Médico Policial Churruca Visca | CABA | Public | 18 | 750 | 53 |
| Hospital Interzonal General de Agudos Pedro Fiorito | PBA | Public | 15 | 325 | 53 |
| Sanatorio Anchorena Recoleta | CABA | Private | 12 | 900 | 49 |
| Sanatorio de los Arcos | CABA | Private | 20 | 1100 | 47 |
| Sanatorio Anchorena San Martín | PBA | Private | 14 | 732 | 41 |
| Hospital Nacional Profesor Alejandro Posadas | PBA | Public | 34 | 900 | 36 |
| Sanatorio Colegiales | CABA | Private | 24 | 1000 | 25 |
| Hospital Interzonal Especializado de Agudos y Crónicos. San Juan de Dios | PBA | Public | 10 | 120 | 23 |
